# Supplementary material for: Motion training on a validated mechanical ERCP simulator improves novice endoscopist performance of selective cannulation: a multicenter trial
Source: PubMed Central journal article supplement — Endosc Int Open. 2021 Jan 25;9(2):E145–51. doi: 10.1055/a-1315-1994 (PMC7834697; doi:10.1055/a-1315-1994), 2021-01-25
Supplement: 2043supmat_10-1055-a-1315-1994.pdf [file 2043supmat_10-1055-a-1315-1994.pdf]

## Supplementary material

Annex 1: E-motion study report form

### E-motion Study Report Form

Center:.....

Trainee ID:.....

**Group Allocation:**     Motion-training Group (A)     Standard-training Group(B)

**Attempt number:**.....

**Type of papilla** (see table below):

| Attempts 0-5                                        | Attempts 6-10                                          | Attempts 11-15                                 | Attempts 16-20                                     |
|-----------------------------------------------------|--------------------------------------------------------|------------------------------------------------|----------------------------------------------------|
| Common bilio-pancreatic channel, normal inclination | Common bilio-pancreatic channel, difficult inclination | Separate bile duct channel, normal inclination | Separate bile duct channel, difficult duct anatomy |

**Time to successful cannulation** (insertion of guidewire in the CBD):

.....seconds

or

**failed cannulation**

**Global assessment by supervisor of trainee performance\*:**

|              |              |                 |            |
|--------------|--------------|-----------------|------------|
| 1 – superior | 2 – advanced | 3- intermediate | 4 - novice |
|--------------|--------------|-----------------|------------|

\*1 (superior), achieves task independently; 2 (advanced), achieves task with minimal verbal instruction; 3 (intermediate), achieves task with multiple verbal instructions; and 4 (novice), unable to complete the procedure.

## Supplementary material

Annex 2: Trainee enrollment across the participating centers

| <b>CENTER</b>                                          | <b>NUMBER OF PARTICIPANTS</b> | <b>PERCENTAGE %</b> |
|--------------------------------------------------------|-------------------------------|---------------------|
| <b>Colentina Hospital (Bucharest)</b>                  | 4                             | 11.1                |
| <b>Policlinico Gemelli (Rome)</b>                      | 11                            | 30.6                |
| <b>Zagreb University Hospital (Zagreb)</b>             | 3                             | 8.3                 |
| <b>S.Orsola-Malpighi University Hospital (Bologna)</b> | 5                             | 13.9                |
| <b>IHU (Strasbourg)</b>                                | 7                             | 19.4                |
| <b>Oxford University Hospitals (Oxford)</b>            | 4                             | 11.1                |
| <b>Erasme Hospital (Bruxelles)</b>                     | 2                             | 5.6                 |
| <b>Total</b>                                           | 36                            | 100                 |
